# Supplementary material for: Identifying the subgroups of depression trajectories among the middle-aged and older Chinese individuals with chronic diseases: an 8-year follow-up study based on CHARLS
Source: Front Public Health. 2024 Sep 11;12:1428384. doi: 10.3389/fpubh.2024.1428384 (PMC11524047; doi:10.3389/fpubh.2024.1428384)
Supplement: Supplementary file 4 [file Table_2.XLSX]

## Sheet: Sheet2
Table S2. Statistical Differences in Influence Factors Among Different Depression Trajectory Subgroups Using Multinomial Logistic Regressio
Variable		Medium growth group					High growth group
		β±SE	Wald χ2	OR(95%CI)	P value		β±SE	Wald χ2	OR(95%CI)	P value
Intercept		1.142±0.520	4.827		0.028		3.415±0.706	23.378		＜0.001
Age		-0.003±0.007	0.14	0.997(0.983, 1.012)	0.709		-0.022±0.008	7.277	0.978(0.962, 0.994)	0.007
Gender	female			1(refence)					1(refence)
female	male	-0.548±0.149	13.577	0.578(0.432, 0.774)	＜0.001		-1.199±0.175	47.2	0.301(0.214, 0.424)	＜0.001
Residence	urban			1(refence)					1(refence)
	rural	0.594±0.139	18.25	1.811(1.379, 2.378)	＜0.001		1.233±0.177	48.539	3.430(2.425, 4.851)	＜0.001
Education	primary school and below			1(refence)					1(refence)
	junior high school	-0.425±0.128	11.055	0.654(0.509, 0.840)	0.001		-0.634±0.148	18.246	0.530(0.396, 0.709)	＜0.001
	high school and above	-0.632±0.169	13.951	0.532(0.382, 0.741)	＜0.001		-0.907±0.209	18.922	0.404(0.268, 0.607)	＜0.001
Marital status	married			1(refence)					1(refence)
	single	0.335±0.148	5.115	1.398(1.046, 1.868)	0.024		0.602±0.157	14.632	1.825(1.341, 2.484)	＜0.001
Social activity participation	yes			1(refence)					1(refence)
	no	0.309±0.108	8.185	1.362(1.102, 1.684)	0.004		0.447±0.121	13.612	1.563(1.233, 1.982)	＜0.001
Number of chronic diseases	1			1(refence)					1(refence)
	2	0.275±0.124	4.897	1.317(1.032, 1.681)	0.027		0.543±0.142	14.635	1.721(1.303, 2.273)	＜0.001
	≥3	0.443±0.140	10.061	1.557(1.184, 2.047)	0.002		1.087±0.152	51.305	2.965(2.202, 3.992)	＜0.001
Smoking status	never			1(refence)					1(refence)
	former	0.095±0.201	0.223	1.099(0.742, 1.629)	0.637		0.146±0.245	0.357	1.157(0.717, 1.869)	0.55
	current	0.140±0.151	0.866	1.151(0.856, 1.546)	0.352		0.288±0.179	2.604	1.334(0.940, 1.894)	0.107
BMI(kg/m2)		-0.004±0.003	1.375	0.996(0.989, 1.003)	0.241		-0.051±0.014	12.383	0.951(0.924, 0.978)	＜0.001
Midday napping(minutes)		-0.003±0.001	6.648	0.997(0.995, 0.999)	0.01		-0.004±0.001	7.74	0.996(0.993, 0.999)	0.005
Nighttime sleep duration (hours)		-0.181±0.032	32.592	0.834(0.784, 0.888)	＜0.001		-0.318±0.035	83.267	0.727(0.679, 0.779)	＜0.001
Reference Group: Low stable group
