# Supplementary material for: Identifying the subgroups of depression trajectories among the middle-aged and older Chinese individuals with chronic diseases: an 8-year follow-up study based on CHARLS
Source: Front Public Health. 2024 Sep 11;12:1428384. doi: 10.3389/fpubh.2024.1428384 (PMC11524047; doi:10.3389/fpubh.2024.1428384)
Supplement: Supplementary file 5 [file Table_3.XLSX]

## Sheet: Sheet1
Sensitivity analysis
Variable		Medium growth group					High growth group
		β±SE	Wald χ2	OR(95%CI)	P value		β±SE	Wald χ2	OR(95%CI)	P value
Intercept		0.910±0.411	4.903		0.027		1.052±0.476	4.886		0.027
Age		-0.003±0.006	0.303	0.997(0.985,1.008)	0.582		-0.013±0.007	3.838	0.987(0.974,1)	0.05
Gender	female			1(refence)					1(refence)
	male	-0.493±0.121	16.548	0.611(0.481,0.774)	＜0.001		-1.077±0.144	55.915	0.341(0.257,0.452)	＜0.001
Residence	urban			1(refence)					1(refence)
	rural	0.402±0.114	12.475	1.495(1.196,1.868)	＜0.001		1.171±0.152	59.599	3.226(2.396,4.344)	＜0.001
Education	primary school and below			1(refence)					1(refence)
	junior high school	-0.366±0.103	12.761	0.693(0.567,0.848)	＜0.001		-0.517±0.121	18.378	0.596(0.471,0.755)	＜0.001
	high school and above	-0.586±0.133	19.346	0.557(0.429,0.723)	＜0.001		-1.012±0.178	32.27	0.364(0.256,0.515)	＜0.001
Marital status	married			1(refence)					1(refence)
	single	0.342±0.116	8.67	1.408(1.121,1.769)	0.003		0.683±0.126	29.283	1.979(1.545,2.534)	＜0.001
Social activity participation	yes			1(refence)					1(refence)
	no	0.217±0.086	6.276	1.242(1.048,1.471)	0.012		0.470±0.099	22.319	1.6(1.316,1.944)	＜0.001
Number of chronic diseases	0			1(refence)					1(refence)
	1	0.363±0.104	12.226	1.437(1.173,1.761)	＜0.001		0.577±0.128	20.408	1.78(1.386,2.286)	＜0.001
	2	0.570±0.123	21.595	1.769(1.391,2.250)	＜0.001		1.107±0.142	60.446	3.027(2.289,4.001)	＜0.001
	≥3	0.713±0.140	26.001	2.039(1.551,2.682)	＜0.001		1.626±0.152	113.943	5.085(3.772,6.854)	＜0.001
Smoking status	never			1(refence)					1(refence)
	former	0.043±0.170	0.065	1.044(0.749,1.456)	0.799		0.151±0.206	0.539	1.163(0.777,1.742)	0.463
	current	0.209±0.121	2.972	1.233(0.972,1.564)	0.085		0.312±0.147	4.472	1.366(1.023,1.823)	0.034
BMI(kg/m2)		-0.001±0.002	0.419	0.999(0.995,1.002)	0.517		0.005±0.009	0.34	1.005(0.998,1.002)	0.56
Midday napping(minutes)		-0.003±0.001	8.998	0.997(0.995,0.999)	0.003		-0.004±0.001	10.617	0.996(0.994,0.998)	0.001
Nighttime sleep duration (hours)		-0.173±0.026	45.371	0.841(0.800,0.885)	＜0.001		-0.302±0.029	110.681	0.739(0.699,0.782)	＜0.001
Reference Group: Low stable group
